# Supplementary material for: All-in-one adeno-associated virus delivery and genome editing by Neisseria meningitidis Cas9 in vivo
Source: PubMed Central journal article supplement (PMC6146650; doi:10.1186/s13059-018-1515-0), 2018-09-19
Supplement: 13059_2018_1515_MOESM1_ESM.pdf [file 13059_2018_1515_MOESM1_ESM.pdf]

# Additional File 1

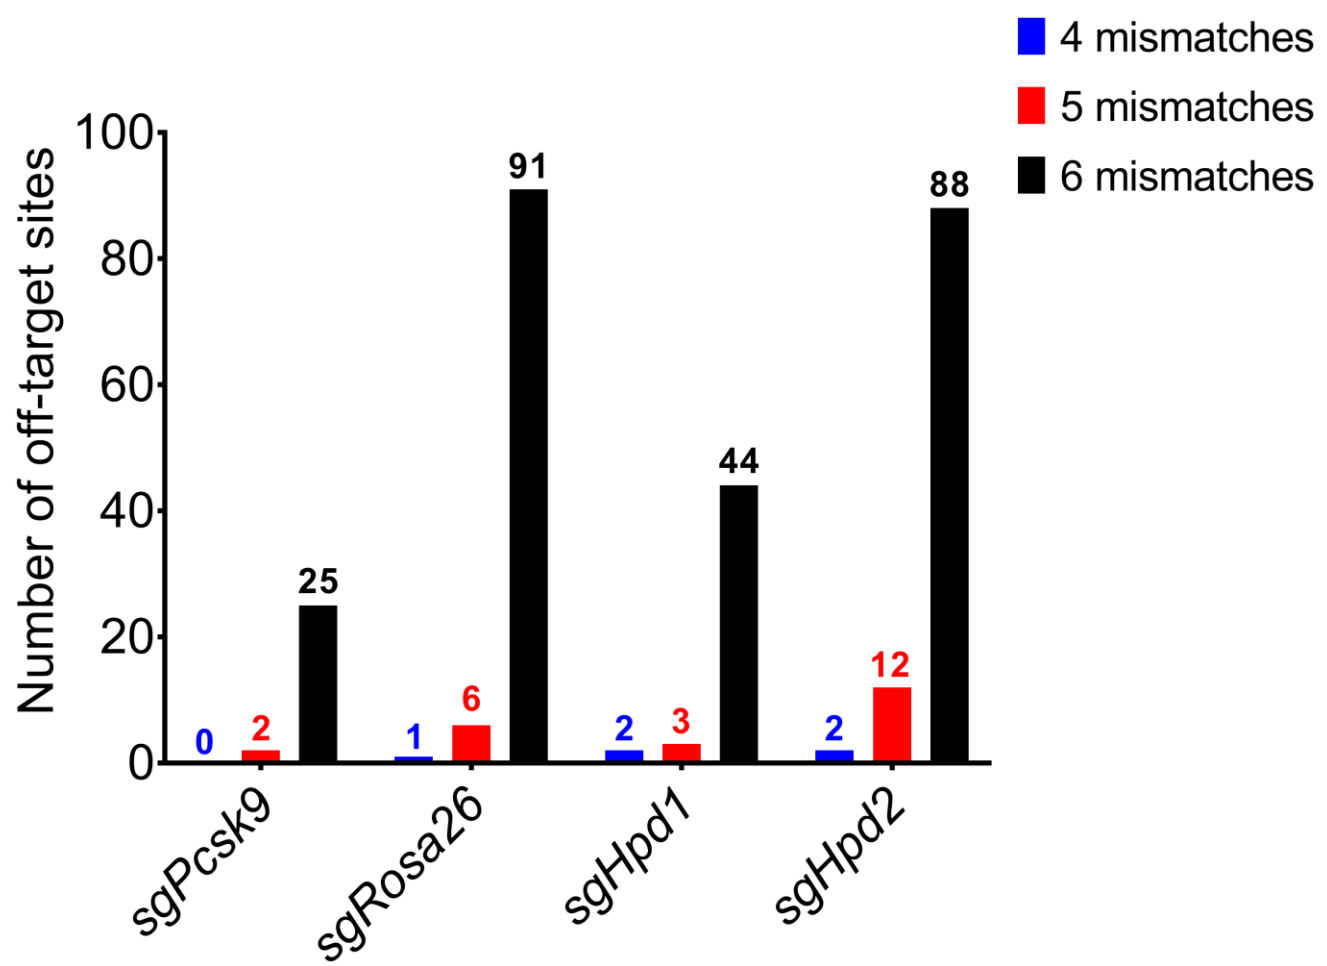

**Fig. S1**

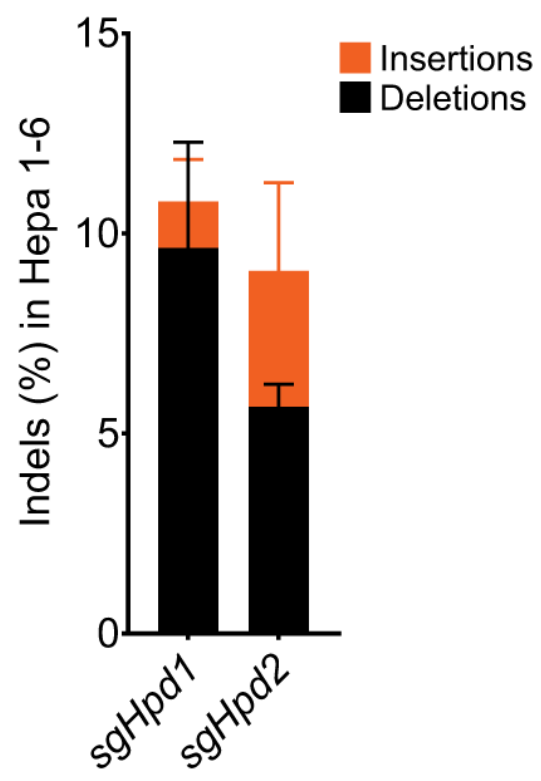

**Fig. S2**

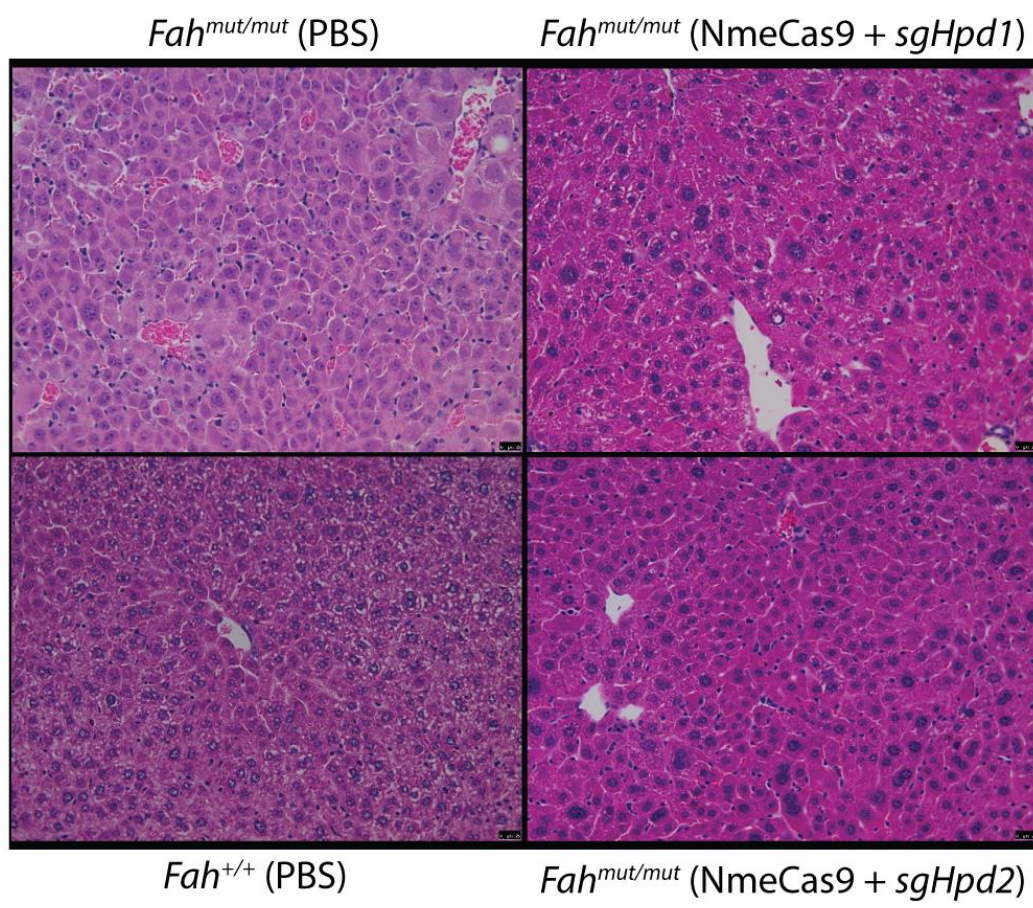

**Fig. S3**

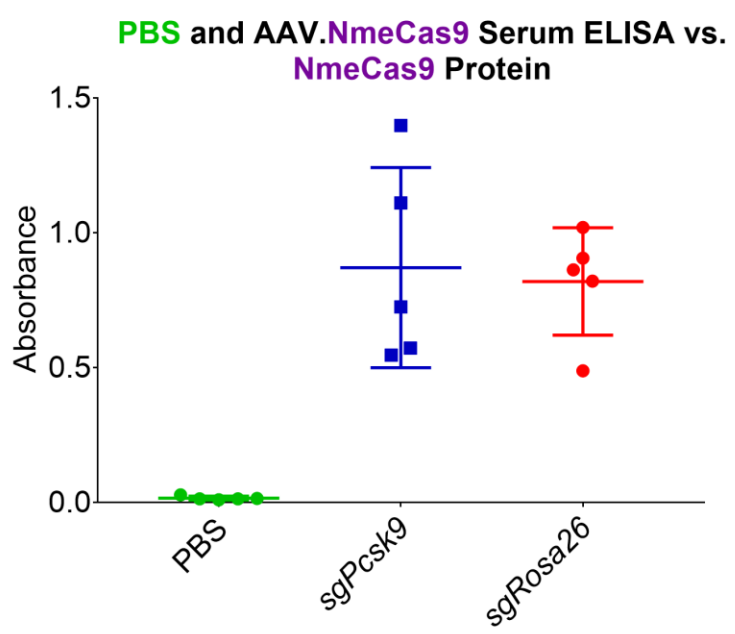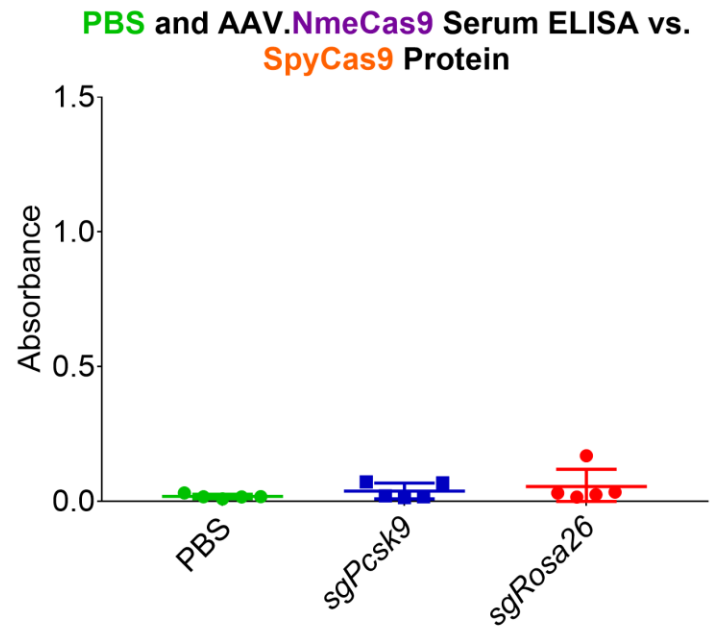

**Fig. S4**

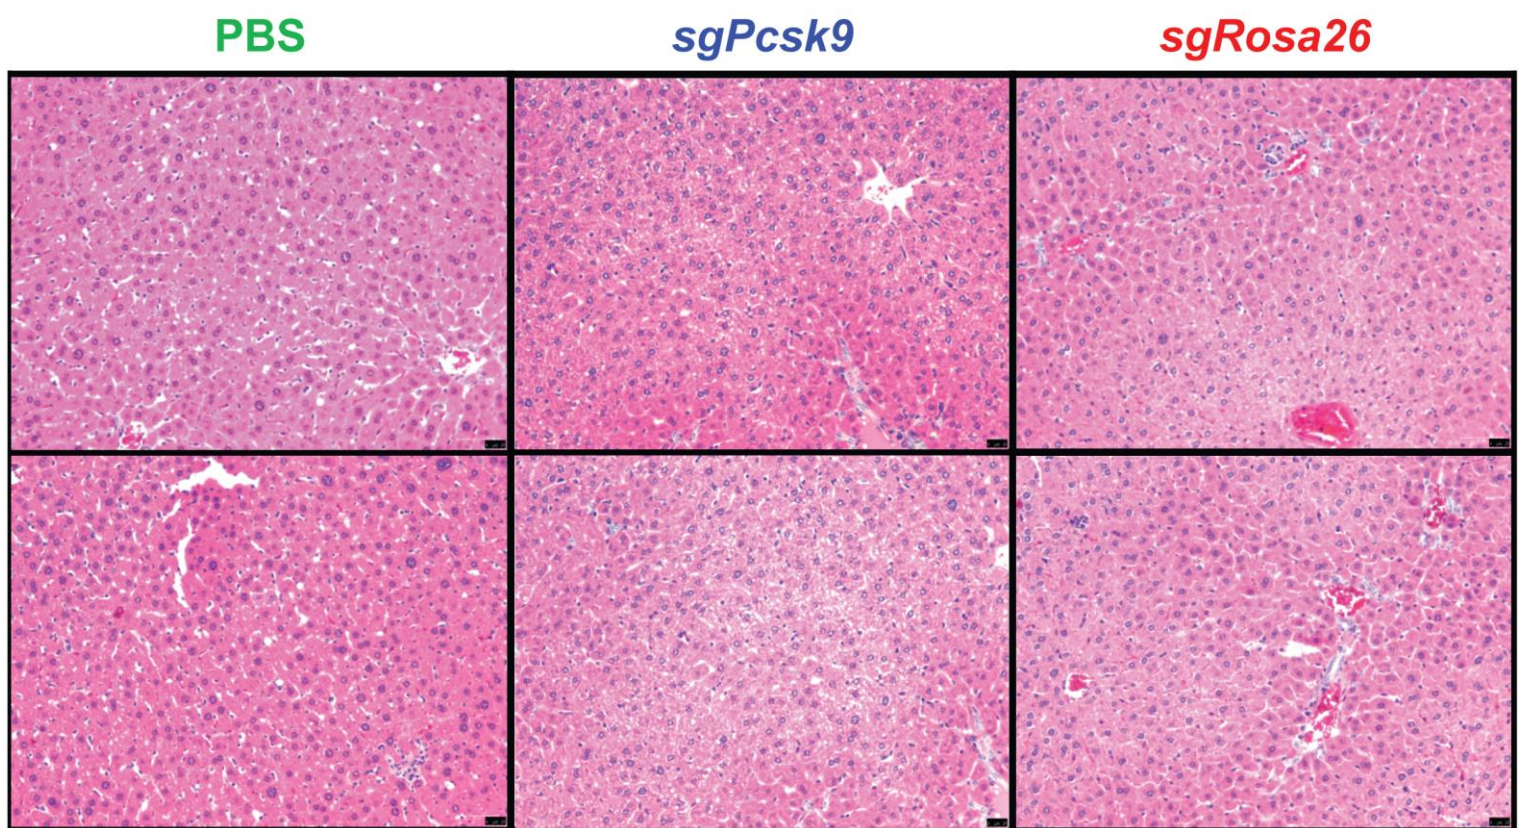

**Fig. S5**
