# Supplementary material for: All-in-one adeno-associated virus delivery and genome editing by Neisseria meningitidis Cas9 in vivo
Source: PubMed Central journal article supplement (PMC6146650; doi:10.1186/s13059-018-1515-0), 2018-09-19
Supplement: 13059_2018_1515_MOESM2_ESM.pdf [file 13059_2018_1515_MOESM2_ESM.pdf]

## Additional File 2

### Nucleotide sequence of all-in-one AAV-sgRNA-hNmeCas9 Plasmid

Legend: sgRNA scaffold **GUIDE sequence** U6 promoter U1a promoter NLS NLS hNmeCas9 NLS 3X-HA NLS **BGH-pA**

gtttaacaaaaataaacgatgccctttaaagcagaagctttaaggggagagcgttgccgacacatcttttcagacggcctt  
attgtagcaacggttctcatttcgtttcggaatgagaaagggagctacaacNNNNNNNNNNNNNNNNNNNNNNNNNNNNCgggttttc  
gtcctttccacaagatatataagccaagaaatcgaaatactttcaagttacggtaagcatatgatagtcattttaaacata  
attttaaaactgcaaactaccaagaaattattactttctacgtcacgtatttgtactaataatctttgtgtttacagtcaaat  
taattctaattatctctctaacagccttgatatgatatgcaaatatgaaggaatcatgggaaataggcctcttctgcccga  
ccttgacgtcgactctagaatggaggcggtaactatgtagatgagaattcaggagcaaaactgggaaaagcaactgcttccaata  
tttgtgatttttacagtgtagtttggaaaaactcttagcctaccaattcttctaagtgttttaaaatgtgggagccagtacac  
atgaagttatagagtgttttaagaggcttaaatatctaccgtaactatgaaatgctacgcataatcatgctgttcaggctcgt  
ggccacgcaactcacttaagcagacagtggttcaaagttttttcttccatttcagggtgctgtaacaccgcccaccatggtg  
cctaagaagaagagaaaggtggaagataaacgcccagcagctacaaagaaggcaggtcaagccaagaaaaagaaagcagcattc  
aagccaaactcaatcaattacatcctgggactggacatcggcatcgcacccgtcgggtgggctatggtcgaaatcgacgaggag  
gagaaccccatccgctgatcgatctgggctgctgctgtttgagagggcagaggtgcctaagaccggcgacagcctggccatg  
gcacggagactggcagctcctgtagggcctgaccgggagaagggcccacagactgctgaggacacgcccgtgctgaagagg  
gagggcgtgctgcaggccgccaacttcgatgagaatggcctgatcaagtcctgcccataccccttggcagctgagggcagcc  
gcctggaccgcaagctgacacctctggagtggctccgctgctgctgcacctgatcaagcaccggggtacctgtctcagaga  
aagacgagggcgagacagccgataaggagctgggcccctgctgaagggagtggcaggaatgcacacgcccctgcagaccggc  
gactttcgacaccagccgagctggccctgaacaagttcgagaaggagagcggccacatccgcaatcagcgtctgactatagc  
cacacctctccggaaggatctgcaggccgagctgatcctgctgtttgagaagcagaaggagtccgcaaccacacgtgtct  
ggcggcctgaaggagggcatcgagacactgctgatgacacagcggcccgcctgagcggcgacgcagtgacagaatgctggga  
cactgcacctttgagccagccgagcccaaggccgccaagaatacctacacagccgagcggttcatctggtgacaaaagctgac  
aatctgaggatcctggagcaggaagcgcgcccactgaccgacacagagagggccaccctgatggatgagccctaccgcaag  
tccaagctgacatatgcacaggcaaggaagctgctggcctggaggacaccgcttctttaaggcctgagatacggcaaggat  
aacgcccagggcctctacactgatggagatgaaggcctatcacgccatcagcaggccctggagaaggagggcctgaaggacaag  
aagtcctcactgaatctgtctcccgagctgcaggatgagatcggcaccgctttagcctgttcaagaccgacgaggatataca  
ggcagactgaaggacaggatccagccagagatcctggaggccctgctgaagcacatcagctttgataagtctgtgcagatcagc  
ctgaaggcctgcccaggatcgtgccactgatggagcagggcaagaggtacgacgaggcctgcgcccgaatctacggcgatcac  
tatggcaagaagaacacagaggagaaaatctacctgcccctatcccccgcatgagatcaggaaccctgtggtgctgcccgc  
ctgtctcaggcaagaaaagtgatcaacggagtggctgcccggtagcgcagccccgcagaatccacatcgagacagccaggga  
gtgggcaagtcctttaaggacagaaaggagatcgagaagaggcaggaggagaacagaaaggatagggaagggccgcccgaag  
ttcagagagtactttcctaattctgtgggagcgaagtcctcaaggatatacctgaagctgaggctgtacgagcagcagcagcc  
aagtgctgtattctggcaaggagatcaacctgggcccctgaatgagaagggtatgtggagatcgaccacgcccctgcctttt  
tctcgaccctgggacgatagcttcaacaataaggtgctgggtgctgggctctgagaaccagaataagggcaaccagacaccctac  
gagtatttcaacggcaaggacaatagccgagagtgaggaggttaaggcaagggtggagacaagcaggttccctcgtccaag  
aagcagagaatcctgctgcagaagtttgacgaggatggcttcaaggagaggaacctgaatgacaccgctacgtgaatcggttt  
ctgtgccagttcgtggccgatagaatgaggctgaccggcaagggcaagaagagagtgtttgcctcaacggccagatcacaat  
ctgctgaggggcttctgggcccctgagaaaggtgagggcagagaacgacagggcaccacgcactggatgcagtggtggtggcatgt  
tctaccgtggccatgcagcagaagatcacacgctttgtgcggtataaggagatgaatgccttcgacggcaagaccatcgataag  
gagacaggcgaggtgctgcaccagaagacacactttcctcagccatgggagttctttgcccaggaagtgatccgggtgttt  
ggcaagcctgacggcaagccagagttcgaggaggccgataaccctggagaagctgagaacactgctggcagagaagctgagctcc  
aggcccagggcagtgacagagtaactgacccactgttctgtctagagcccccaacaggaagatgagcggccagggccacatg  
gagacagtgaagtccgccaagagactggacgagggcgtgtctgtgctgaggggtgcctctgacacagctgaagctgaaggatctg  
gagaagatggtgaatcgcgagcgggagccaaagctgtatgaggccctgaaggcaaggctggaggcacacaaggacgatcctgcc  
aaggcctttgcccagcattctacaagtatgataagggccggcaacagaaccagcaggtgaaggcctgaggggtggagcaggtg  
cagaagacagggcgtgtgggtgcgcaaccacaatggcatcggcacaatgctaccatggtgcccgtggcagctgtttgagaagggc  
gataagtaactatctggtgccatctacagctggcaggtggccaagggcatcctgctgatagagccgtggtgcagggcaaggac  
gaggaggattggcagctgatcgacgattccttcaactttaagttctctctgaccccattgacctggtggaagtgatccaag  
aaggccaggatgtttggctacttcgctcctgcccaccgcccagggcaacatcaatatccgatccaacgacctggatcacaag  
atcggcaagaacggcatcctggaggatcggcgtgaagacagccctgagcttcagaagatcagatcgacgagctgggcaag  
gagatcagacctgtaggctgaagaagcggccaccctgctgggaggaatgaagcggcccgcagcaaccaagaagggcagggcc  
aagaagaagaagTaccctatgacgtgctgactacgcccgggtatccctacgacgtgctgattacgcccgggtcctatccctac  
gacgtgccagattacgtgacgtccagcagcgaagaaaaagaagctggattaaagatctttttccctctgcccataaattatggg  
gacatcatgaagccccttgagcatctgacttctggctataaaaggaatttttttattttcattgcaatagtgtgttgaattttttg  
tgtctctca
