# Supplementary material for: All-in-one adeno-associated virus delivery and genome editing by Neisseria meningitidis Cas9 in vivo
Source: PubMed Central journal article supplement (PMC6146650; doi:10.1186/s13059-018-1515-0), 2018-09-19
Supplement: 13059_2018_1515_MOESM3_ESM.pdf [file 13059_2018_1515_MOESM3_ESM.pdf]

# Additional file 3:

## Protospacer sequences

| Name         | Gene               | Chr                        | Protospacer Sequence              |
|--------------|--------------------|----------------------------|-----------------------------------|
| sgHpd1       | <i>Hpd</i>         | chr5:-:123178208:123178239 | ATCAACTACACTGGCCGTTTCTTACCTGGATT  |
| sgHpd2       | <i>Hpd</i>         | chr5:-:123175950:123175981 | TTGTTTCCCCTCCTCCCAGGAATATGTGGACT  |
| sgPcsk9      | <i>Pcsk9</i>       | chr4:-:106463790:106463821 | CGGCGCTGGTGCCAGGACGAGGATGGAGATT   |
| sgRosa26     | <i>Rosa26</i>      | chr6+:113076048:113076079  | TGCAGATCACGAGGGAAGAGGGGGAAGGGATT  |
| sgPcsk9_OT1  | <i>unannotated</i> | chr6:-:24894402:24894433   | GGCGCTGTGTGTCTGACGAGGAACTGGACT    |
| sgPcsk9_OT2  | <i>Rnf214</i>      | chr9+:45868164:45868195    | AGGAACTGGAGCAAAGGACAAAggagatggtt  |
| sgPcsk9_OT3  | <i>Pcsk9</i>       | chr4:-:106463561:106463592 | AGGTGCGGGAGGCGAGGGCAAGACTTAGTGCT  |
| sgPcsk9_OT4  | <i>unannotated</i> | chr16+:47959998:47960029   | AGGGAACCTGGGACCAGGACAAGGAGCTTGATT |
| sgRosa26_OT1 | <i>Ptcd2</i>       | chr13:-:99335395:99335426  | gtcataacaccaggaagaggaggcctggatt   |
| sgRosa26_OT2 | <i>unannotated</i> | chr1:-:96248259:96248290   | TGGCAGAACagaggaagagagggggaggat    |
| sgRosa26_OT3 | <i>Tctn3</i>       | chr19:-:40606453:40606484  | AGCAGATCAGAGGGAAGAGGGAGGGGTGGAGA  |
| sgRosa26_OT4 | <i>unannotated</i> | chr3:-:121042039:121042070 | TACACATCTCTGAGGGTGATGGGCTTGGGGCT  |
| sgRosa26_OT5 | <i>unannotated</i> | chr10:-:8135358:8135389    | TGCAGAGGTTTACAAACggggggggggggggg  |
| sgRosa26_OT6 | <i>Sergef</i>      | chr7:-:46544656:46544687   | gccagaagaccaggtaggacttgacgacaag   |

## TIDE Primers

| Target Site | 5' Primer            | 3' Primer            |
|-------------|----------------------|----------------------|
| sgHpd1      | GGCAGGTAGTCGAACATTCC | CAGCCGTGGTAACTGAACA  |
| sgHpd2      | CTGTGGTGTGCATGATGTC  | CAGCAAATAACCAGCGG    |
| sgPcsk9     | GGCTCCCGTTCTCTCTCTCT | CGCTAAATCGAGGCCTACAG |
| sgRosa26    | TCAGTTGGGCTGTTTTGGAG | TAGGGGTTGGATAAGCCAGT |

## Deep-sequencing Primers

| Target Site  | 5' Primer                                       | 3' Primer                                    |
|--------------|-------------------------------------------------|----------------------------------------------|
| sgPcsk9      | ctacacgacgctctccgatctGCTACTGTGCCCCACCGG         | agacgtgtgctctccgatctCTCATCAGCCAGGCCATC       |
| sgPcsk9_OT1  | ctacacgacgctctccgatctGTGAGGTGCCAGAGTGGTGT       | agacgtgtgctctccgatctGGCTGTCAGGGTGAGAAGTG     |
| sgPcsk9_OT2  | ctacacgacgctctccgatctCGACAAAAGAGATGAGGAGAAAA    | agacgtgtgctctccgatctTGAAGTCAAGTCCTTATGCTTGC  |
| sgPcsk9_OT3  | ctacacgacgctctccgatctCCTCCCCATCACTCTGTG         | agacgtgtgctctccgatctTCTAGCCGTCTGGTGGTCTC     |
| sgPcsk9_OT4  | ctacacgacgctctccgatctTTTGAAATGCAATCATAGCACA     | agacgtgtgctctccgatctGAGACAGTAGAGCAGAATGAAGGA |
| sgRosa26     | ctacacgacgctctccgatctCTTCTGAGGACCGCCCT          | agacgtgtgctctccgatctGCCTTTAAGCCTGCCAG        |
| sgRosa26_OT1 | ctacacgacgctctccgatctCACTGGCTTGGAACACACAA       | agacgtgtgctctccgatctGCCACGGTTTCAGAAAGTA      |
| sgRosa26_OT2 | ctacacgacgctctccgatctTCTCTGCCATTTCTCTTCC        | agacgtgtgctctccgatctAAGCCCATGATTTTGTGAAA     |
| sgRosa26_OT3 | ctacacgacgctctccgatctATGGAGAAGCCTCCCTTAC        | agacgtgtgctctccgatctCCCTAAGTTTAACCCTCAGCA    |
| sgRosa26_OT4 | ctacacgacgctctccgatctGACAAATATGAGTTTTACTACCAGGA | agacgtgtgctctccgatctCGTCTTAATGAGCCCGATCT     |
| sgRosa26_OT5 | ctacacgacgctctccgatctTCAGGAAACACTTCCGCTTC       | agacgtgtgctctccgatctCCGAACATCAGGATGTGAAA     |
| sgRosa26_OT6 | ctacacgacgctctccgatctGAGCTTTCTGCCTCTGTGCT       | agacgtgtgctctccgatctGGAGGAGGTGCTATCTGTGC     |
